# Supplementary material for: Breaking the waves: improved detection of copy number variation from microarray-based comparative genomic hybridization
Source: PubMed Central journal article supplement (PMC2246302; doi:10.1186/gb-2007-8-10-r228), 2007-10-25

## Chromosome 1

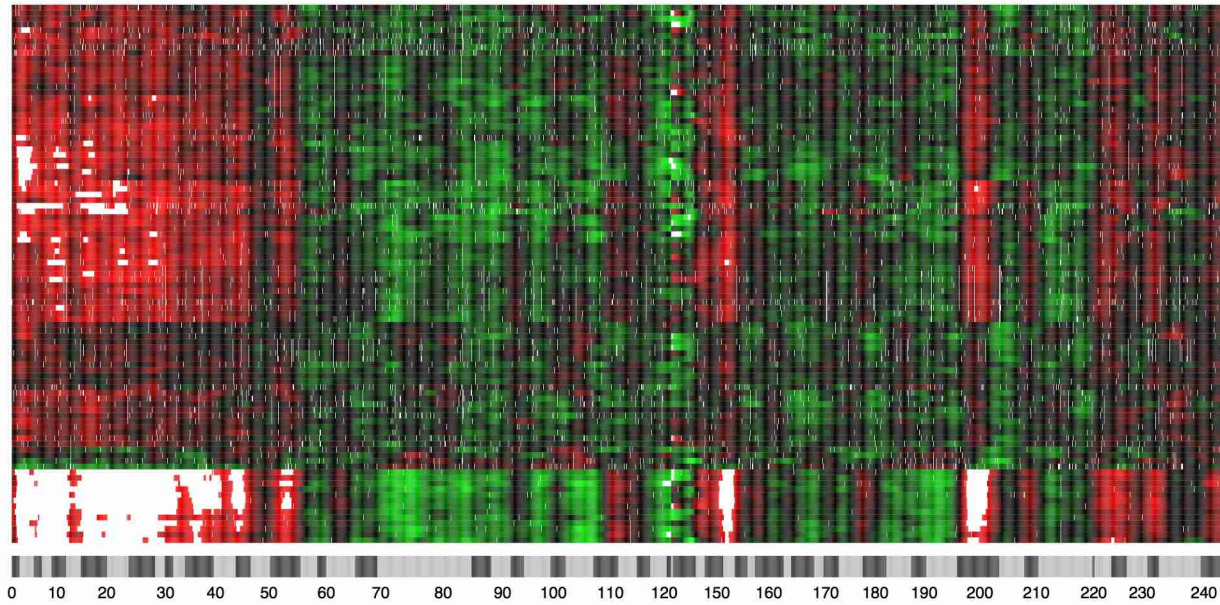

## Chromosome 2

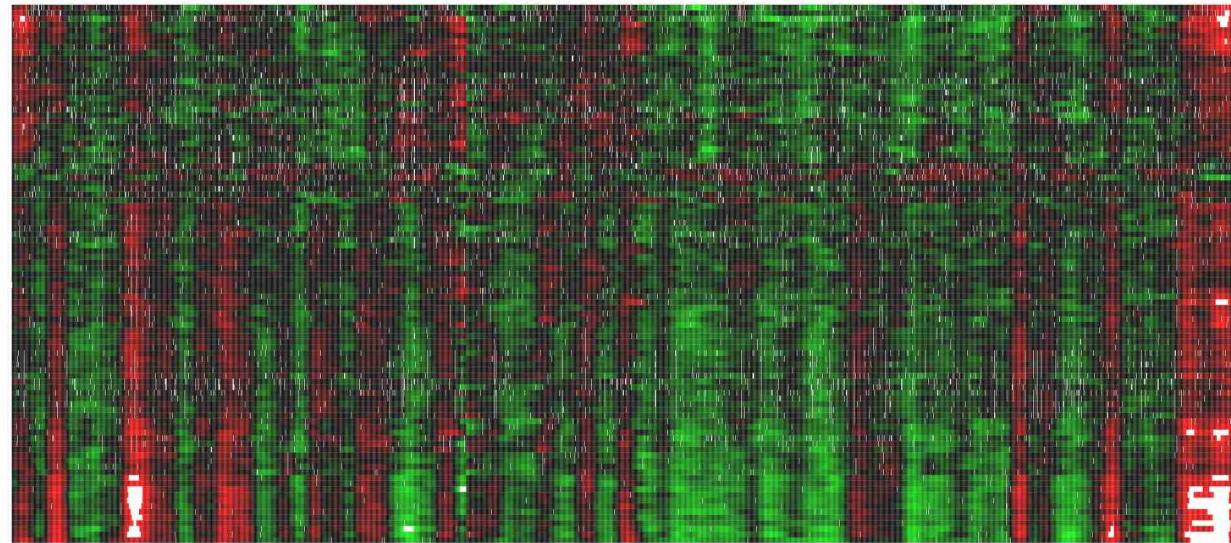

0 10 20 30 40 50 60 70 80 91 110 120 130 140 150 160 170 180 190 200 210 220 230 240

### Chromosome 3

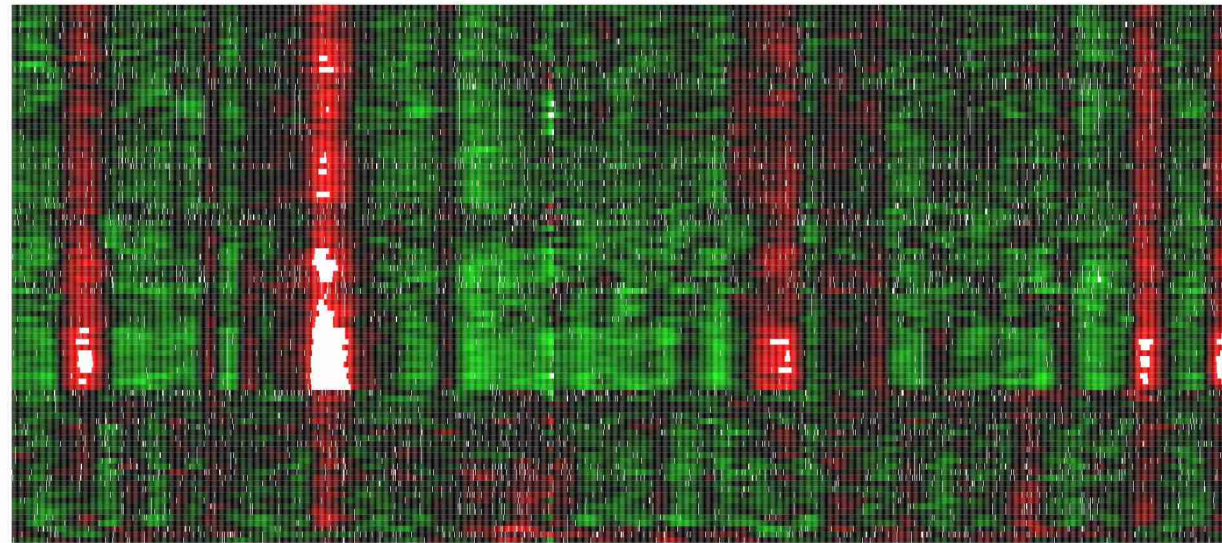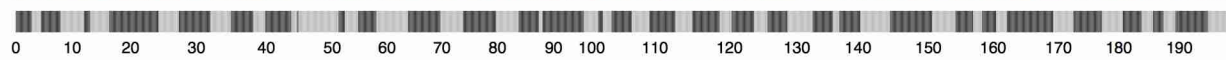

## Chromosome 4

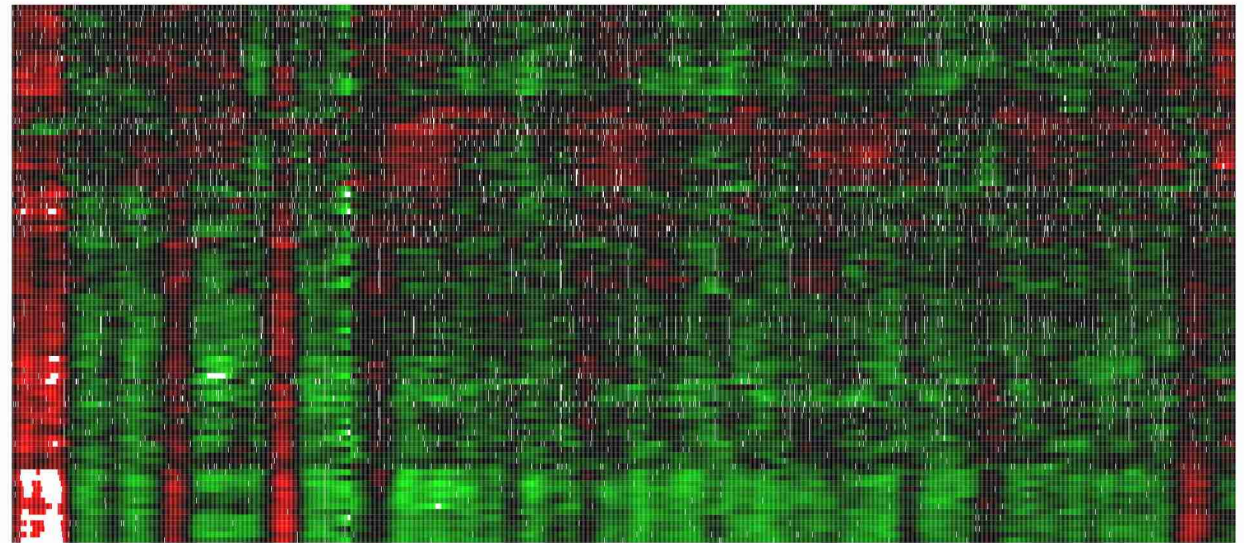

0 10 20 30 40 52 60 70 80 90 100 110 120 130 140 150 160 170 180 190

## Chromosome 5

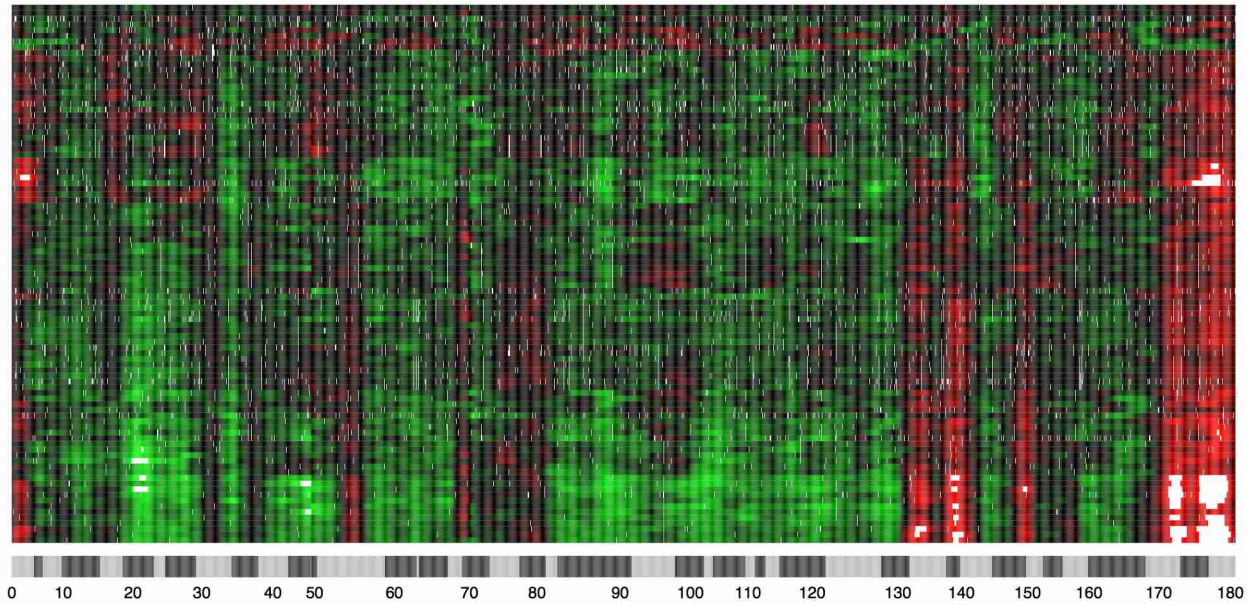

## Chromosome 6

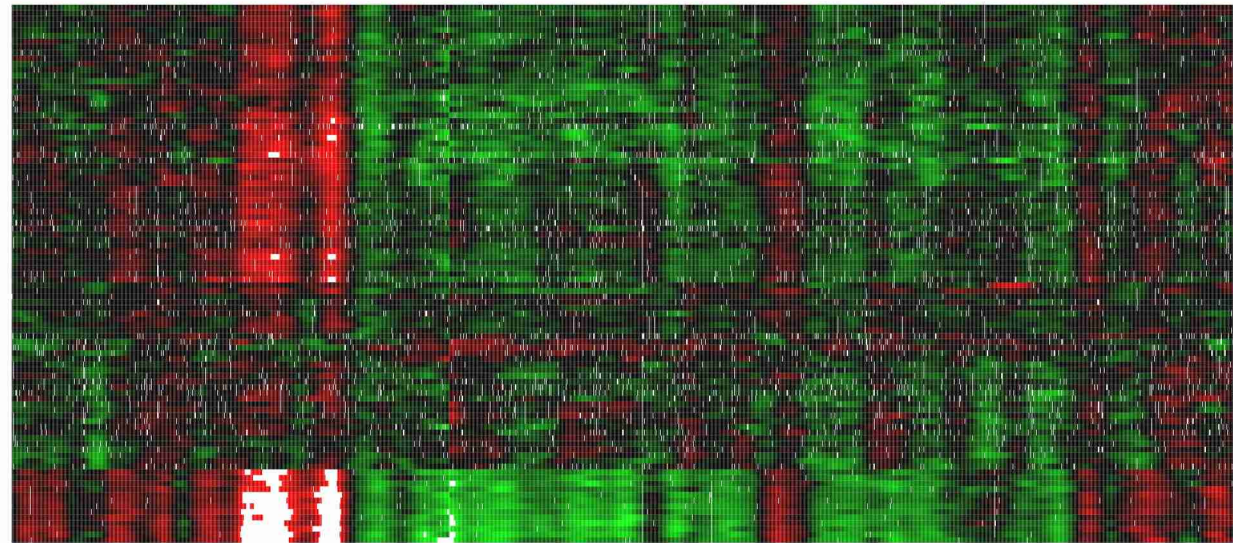

0 10 20 30 40 50 61 70 80 90 100 110 120 130 140 150 160 170

## Chromosome 7

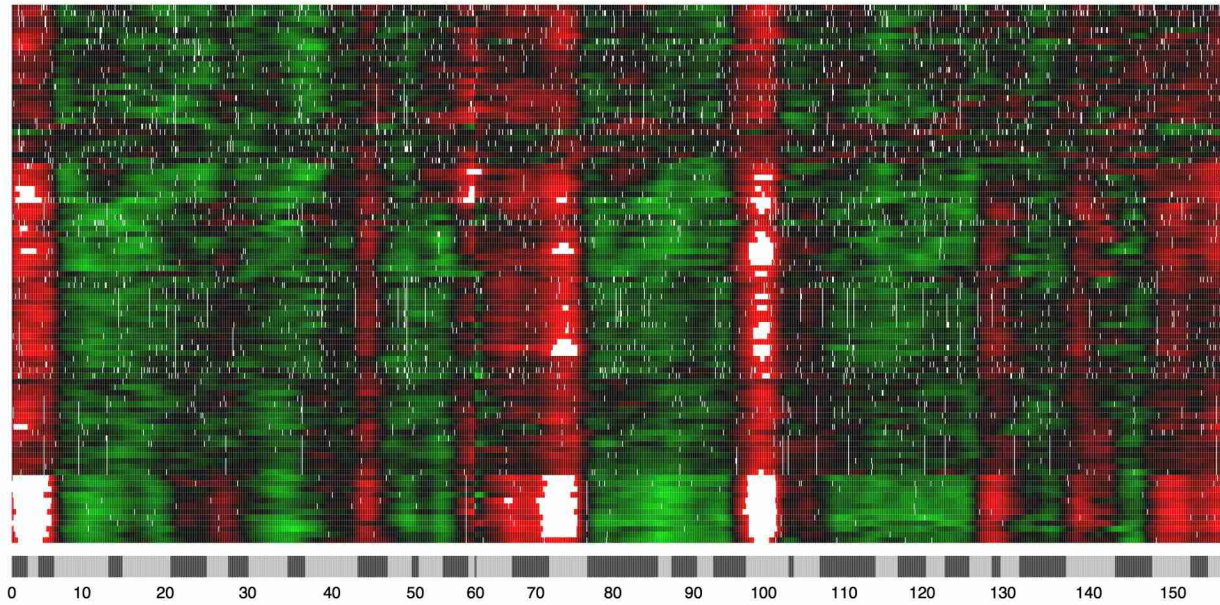

## Chromosome 8

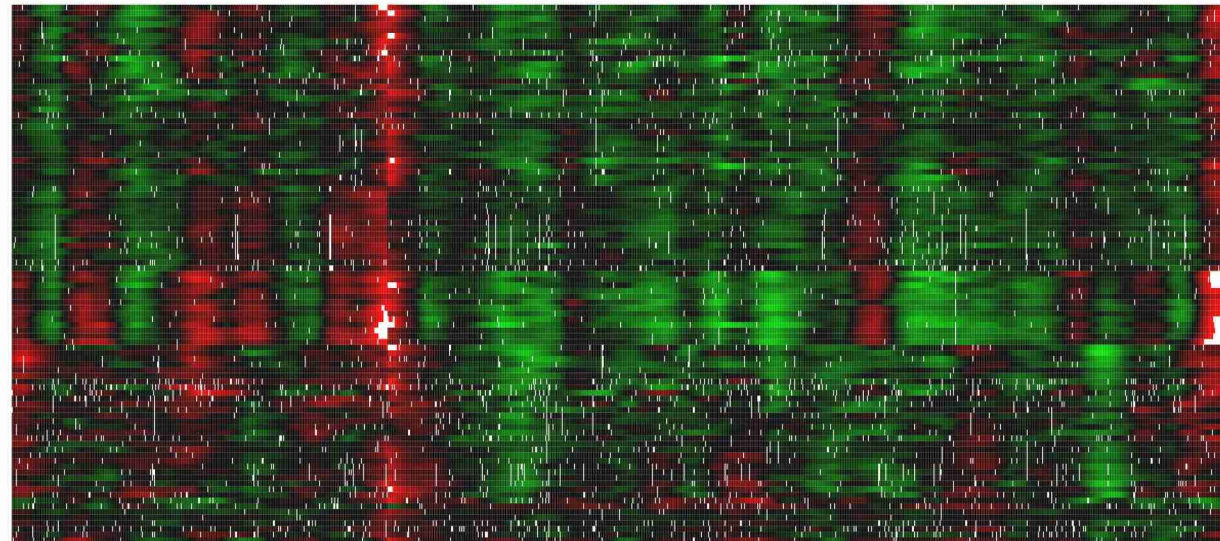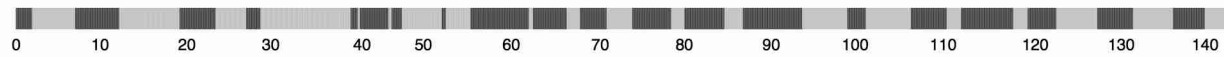



## Chromosome 9

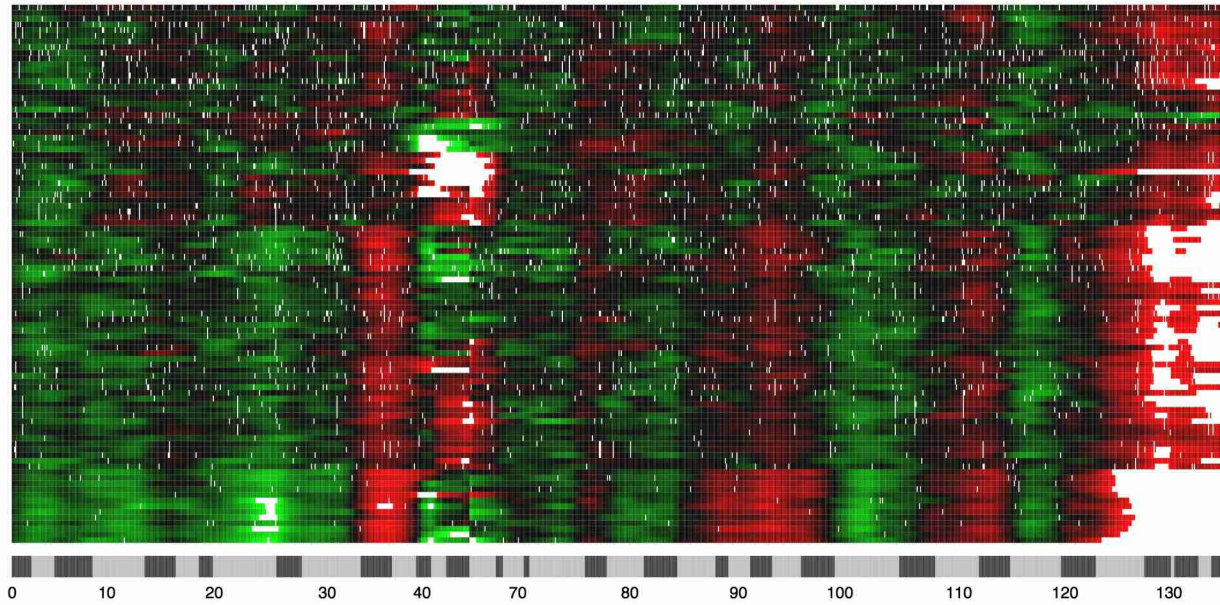

## Chromosome 10

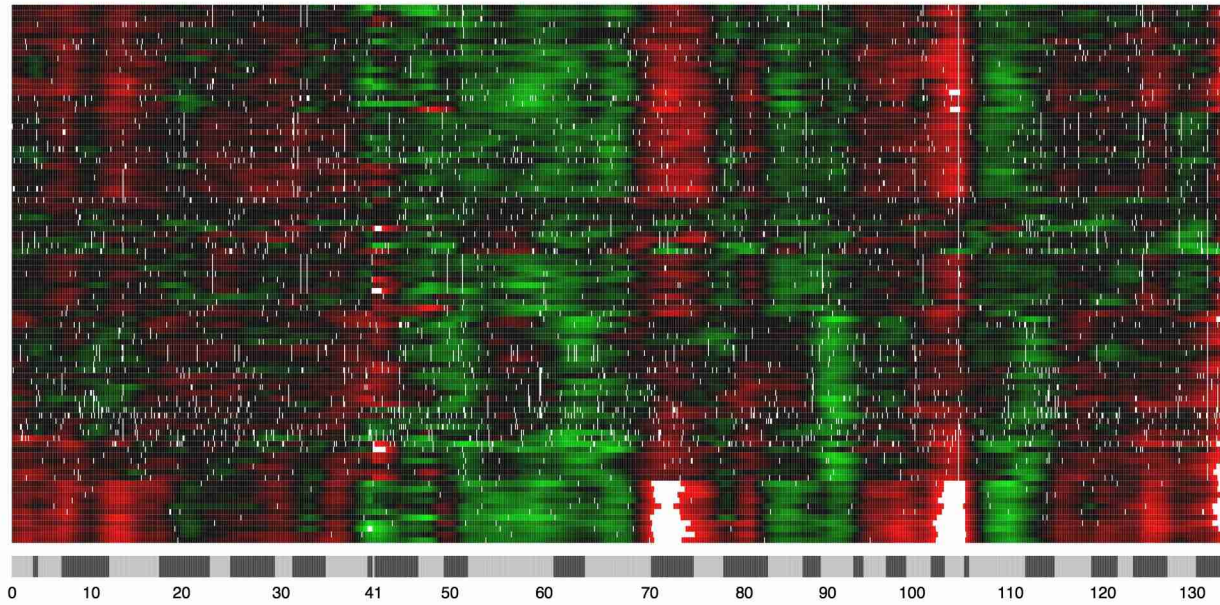

## Chromosome 11

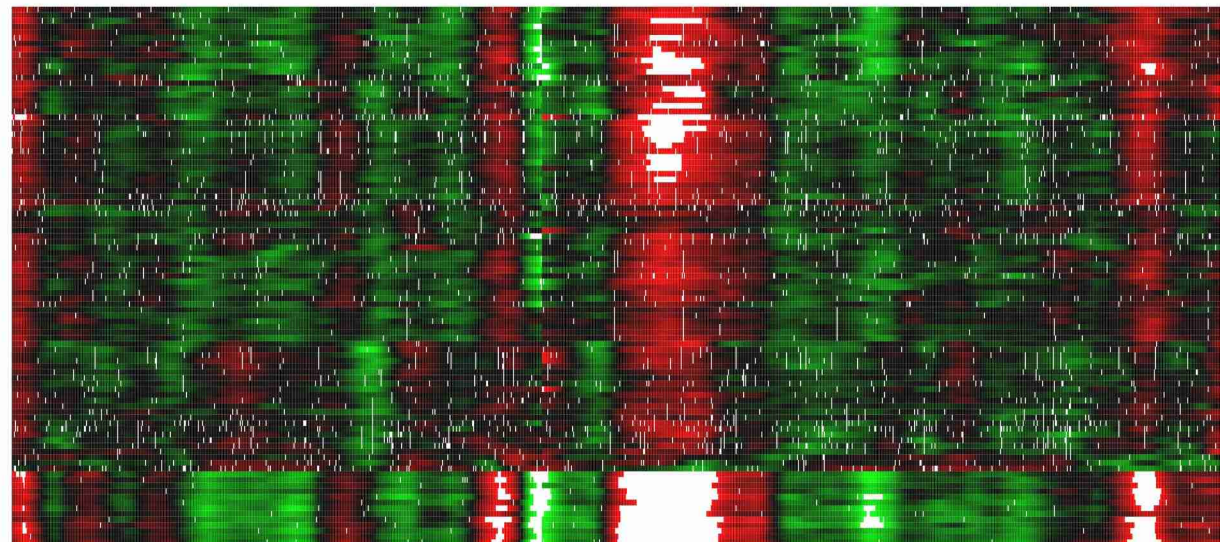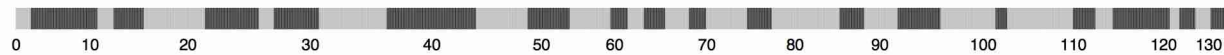

## Chromosome 12

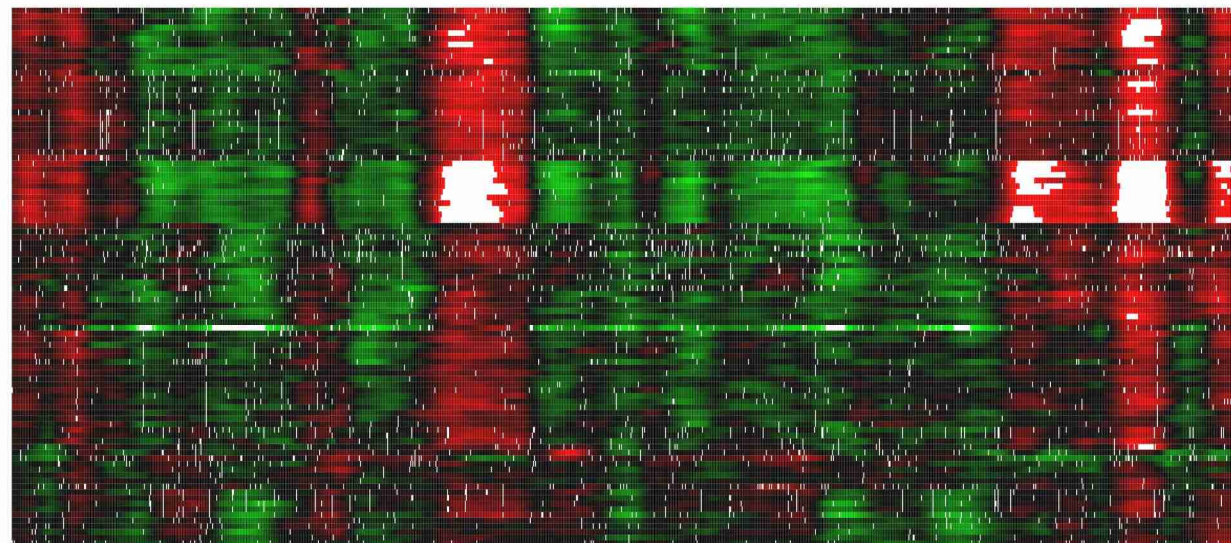

0 10 20 30 40 50 60 70 80 90 100 110 120 130

## Chromosome 13

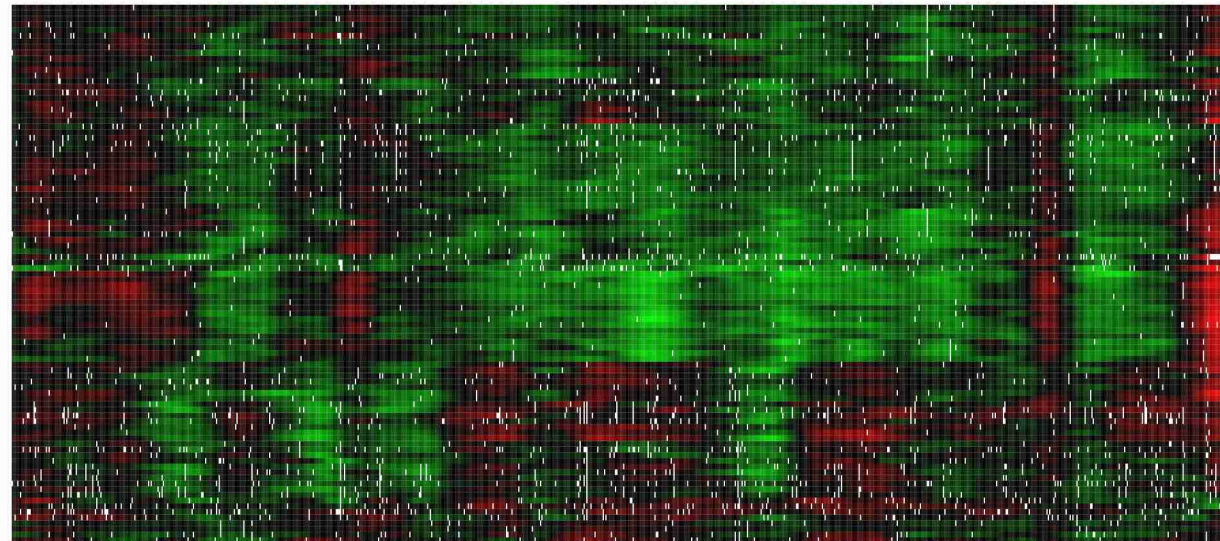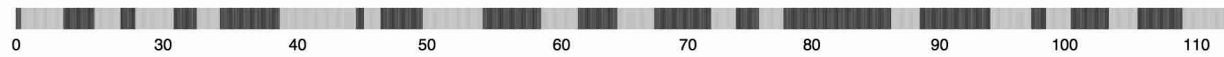

## Chromosome 14

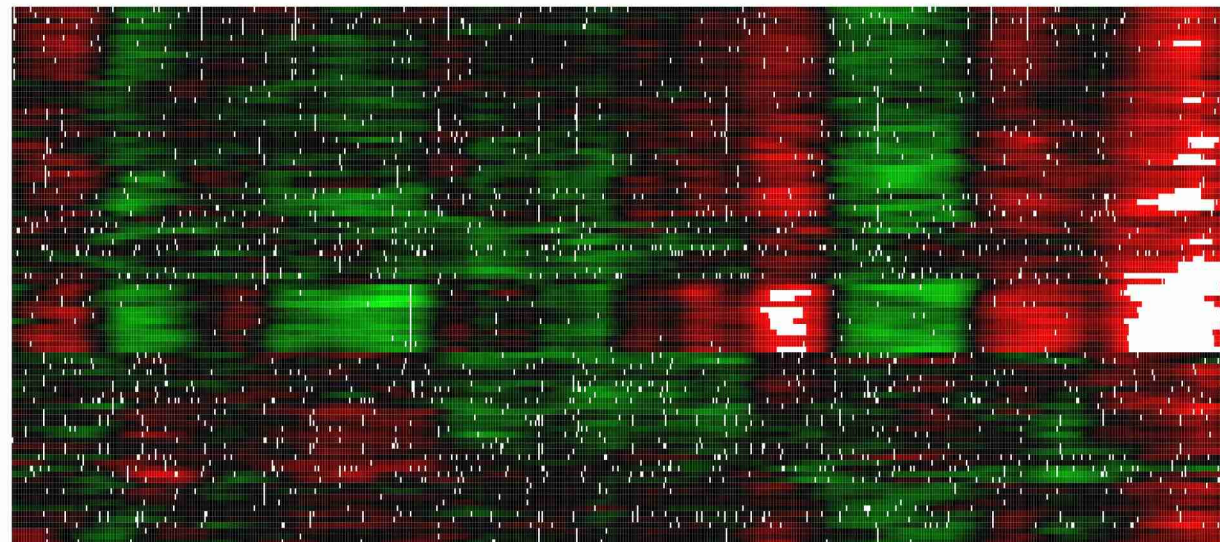

0 20 30 40 50 60 70 80 90 100

### Chromosome 15

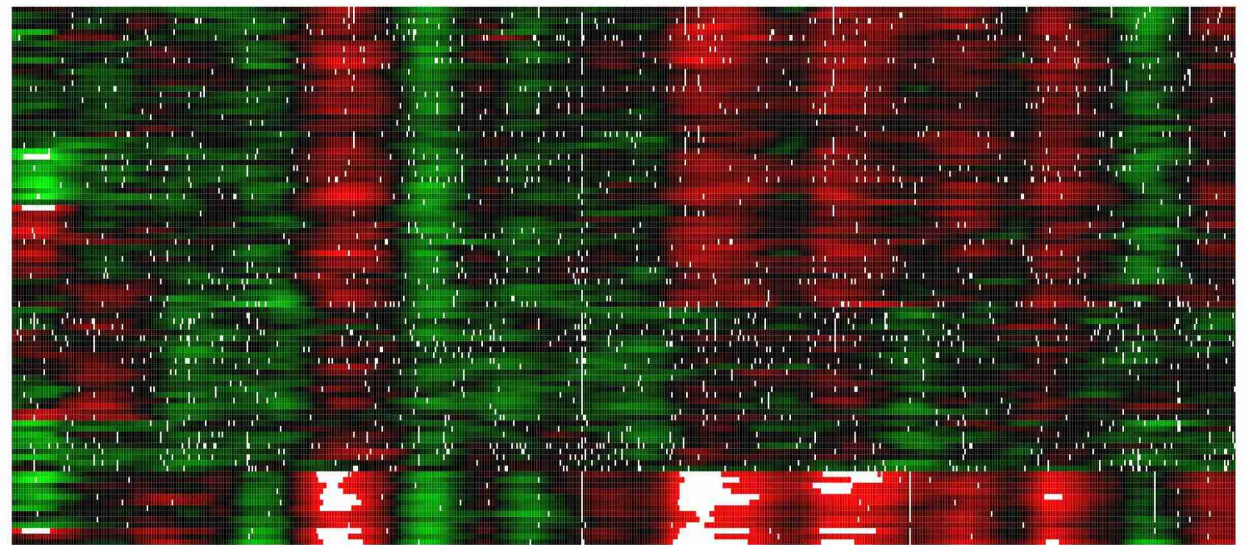

0 20 30 40 50 60 70 80 90 100

### Chromosome 16

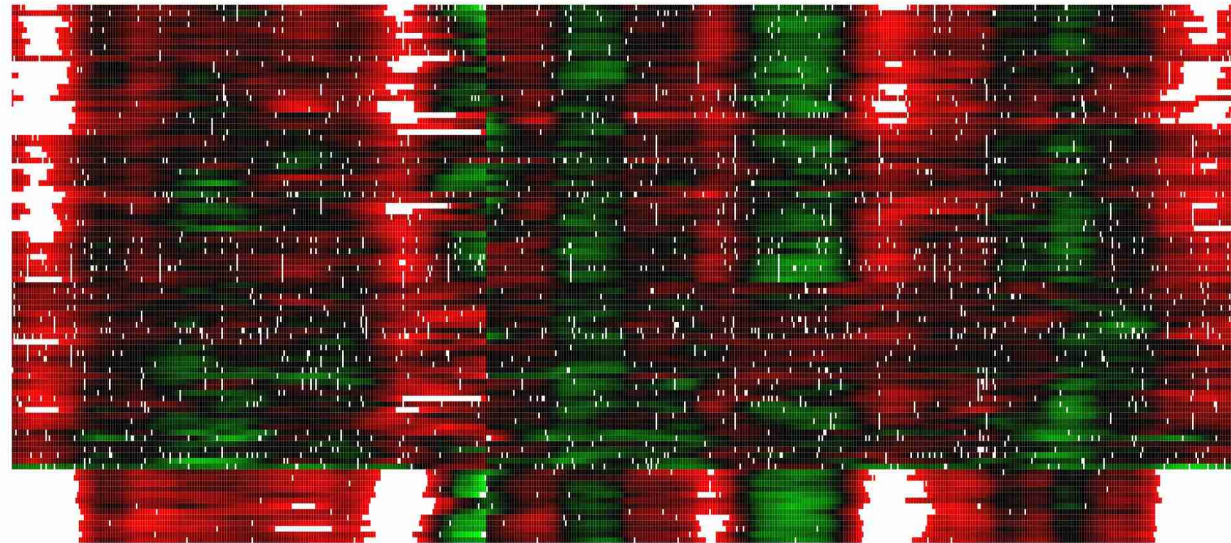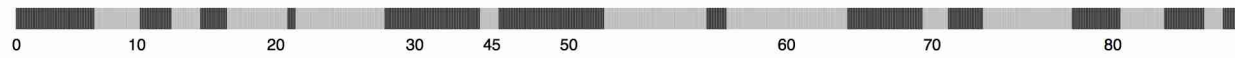



### Chromosome 17

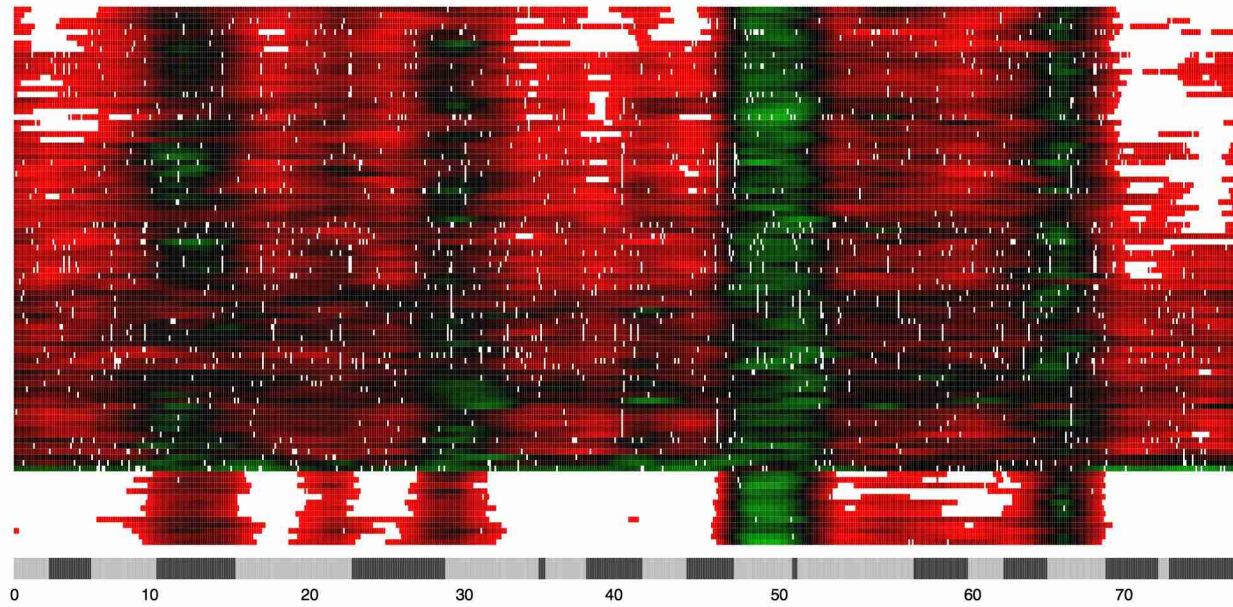

## Chromosome 18

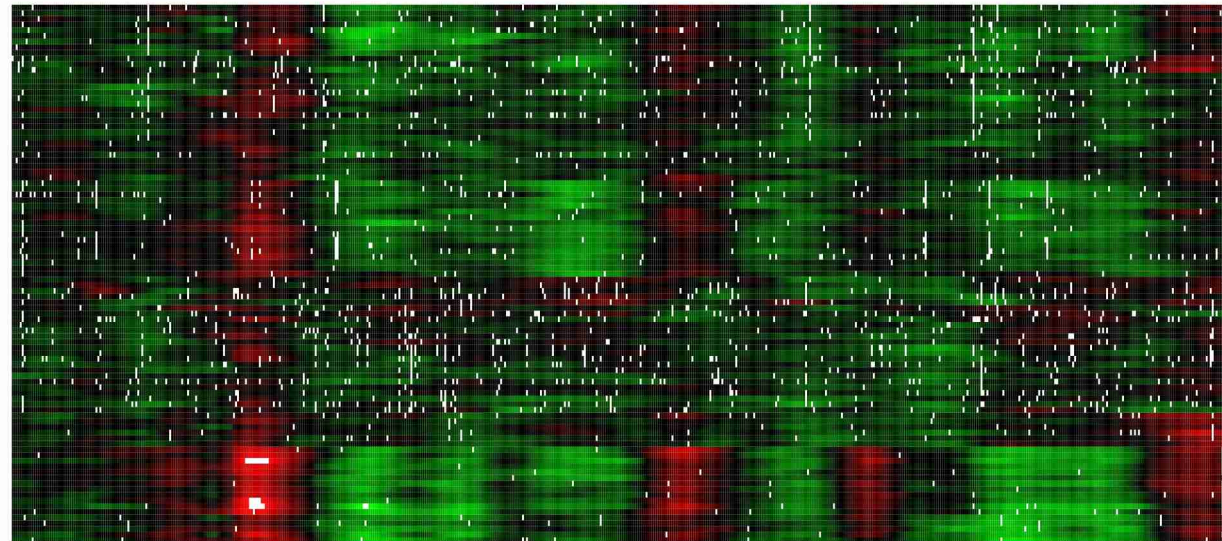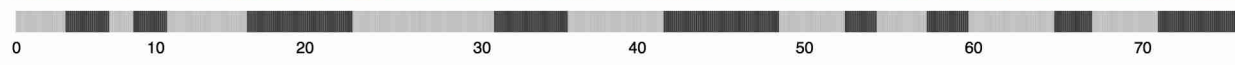

### Chromosome 19

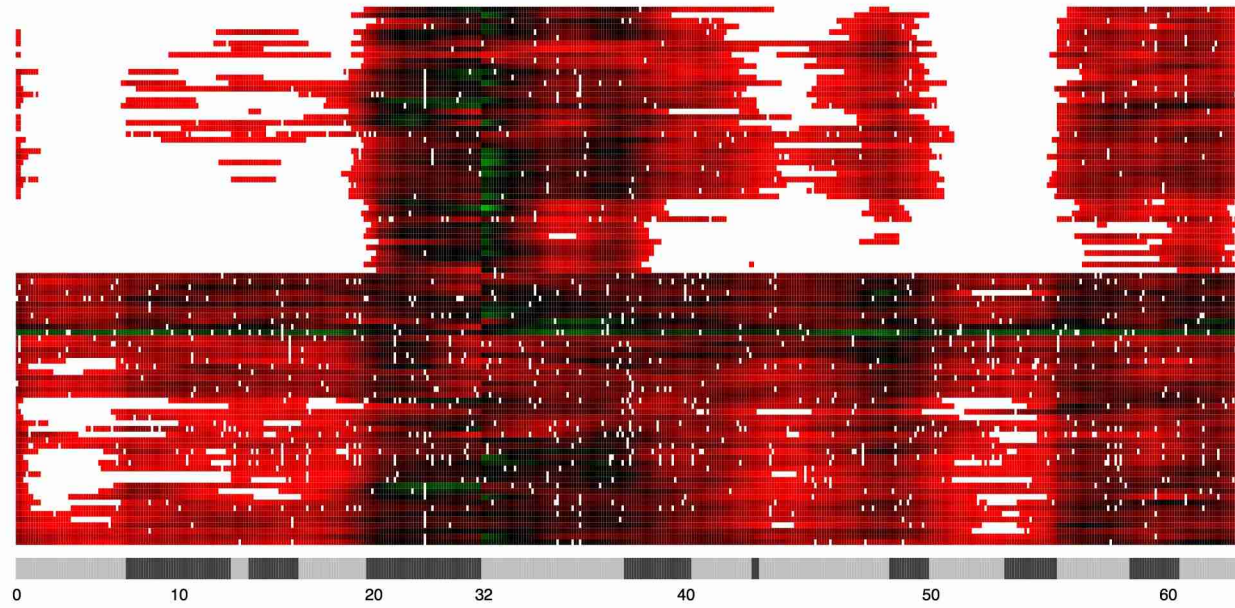

## Chromosome 20

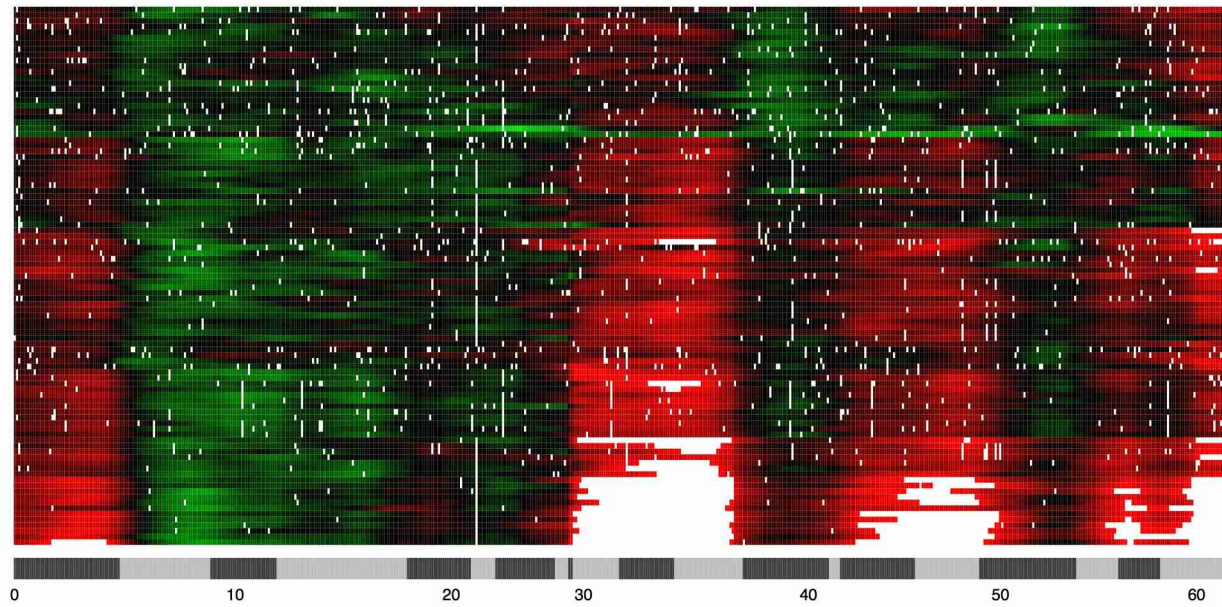

## Chromosome 21

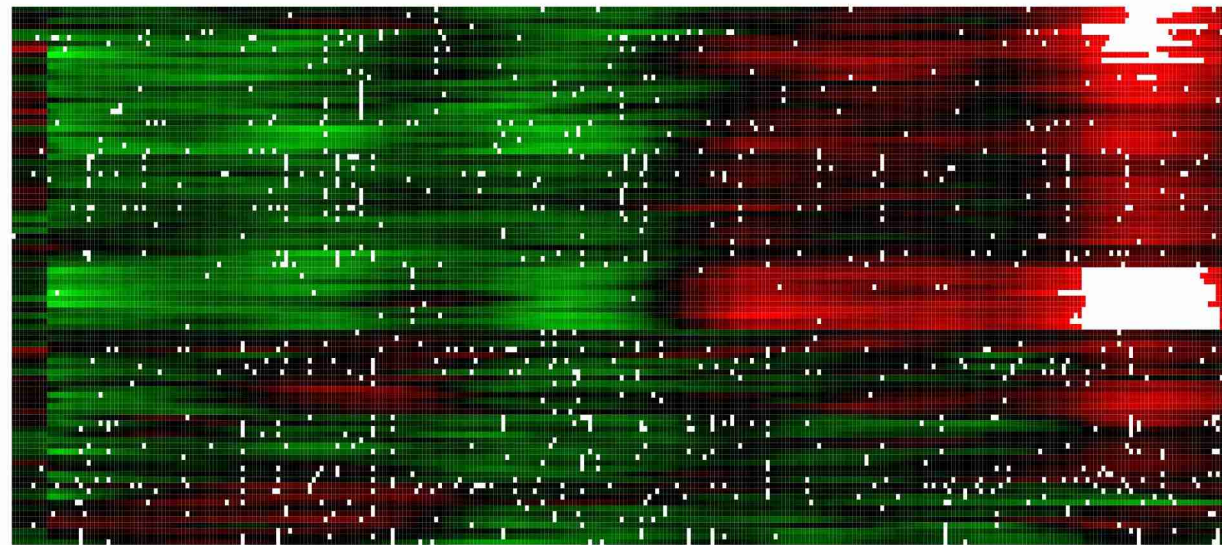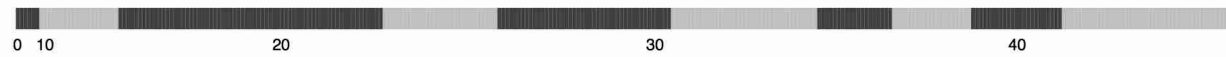

## Chromosome 22

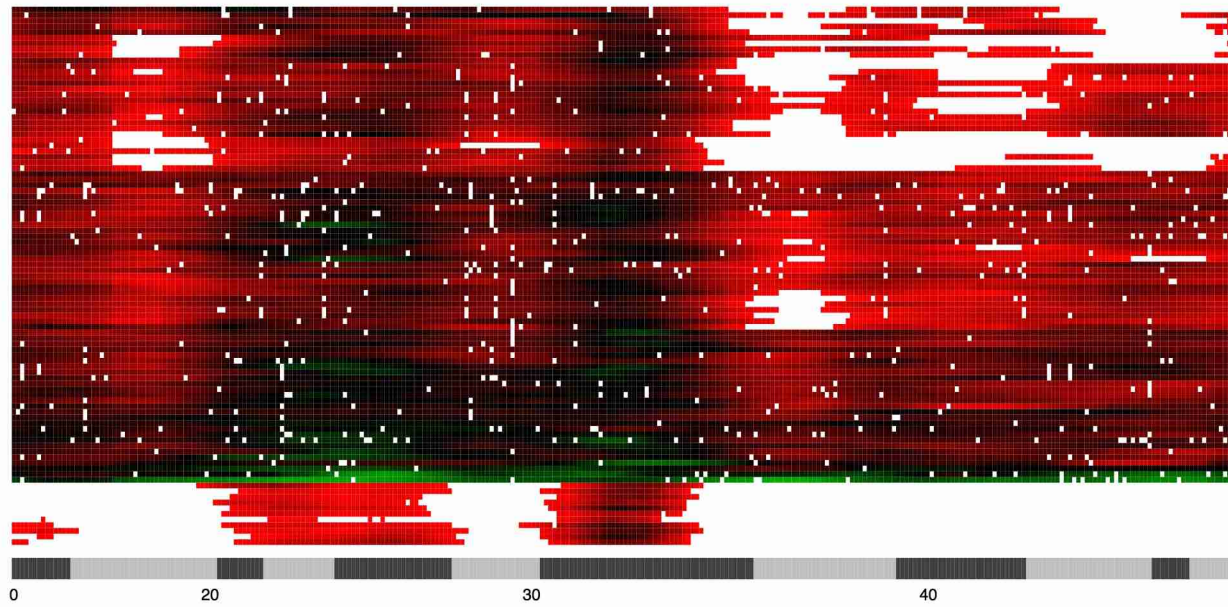

Supplement: gb-2007-8-10-r228-S9.pdf [file gb-2007-8-10-r228-S9.pdf]
