# Supplementary material for: Breaking the waves: improved detection of copy number variation from microarray-based comparative genomic hybridization
Source: PubMed Central journal article supplement (PMC2246302; doi:10.1186/gb-2007-8-10-r228), 2007-10-25
Supplement: gb-2007-8-10-r228-S5.pdf [file gb-2007-8-10-r228-S5.pdf]

| Number of outlier clones identified using the threshold |         |         |         |
|---------------------------------------------------------|---------|---------|---------|
|                                                         | NA11829 | NA12044 | NA19093 |
| Before Wave Correction                                  | 106     | 121     | 122     |
| After Wave Correction                                   | 79      | 68      | 80      |
