# Supplementary material for: Breaking the waves: improved detection of copy number variation from microarray-based comparative genomic hybridization
Source: PubMed Central journal article supplement (PMC2246302; doi:10.1186/gb-2007-8-10-r228), 2007-10-25

The sensitivity (with confidence intervals) for the validated data

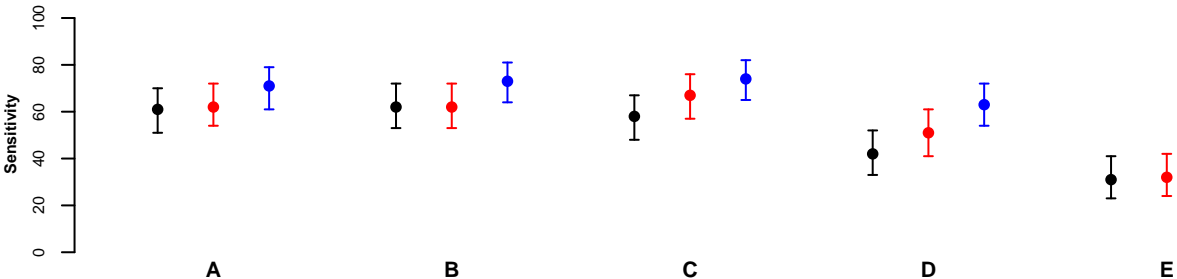

The specificity (with confidence intervals) for the validated data

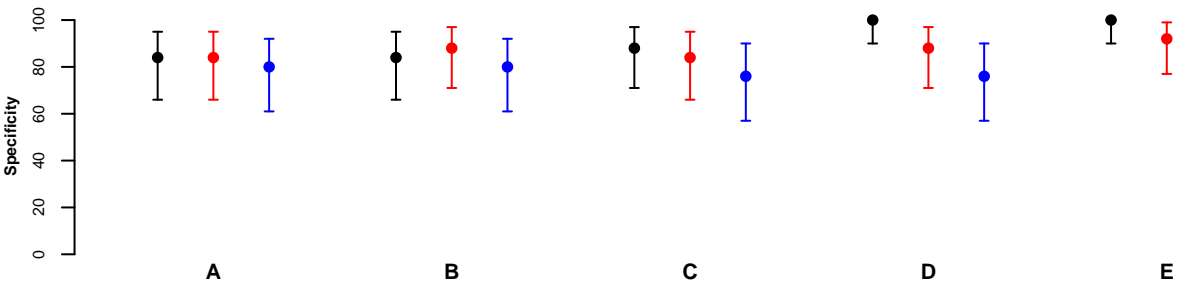

The false discovery rate

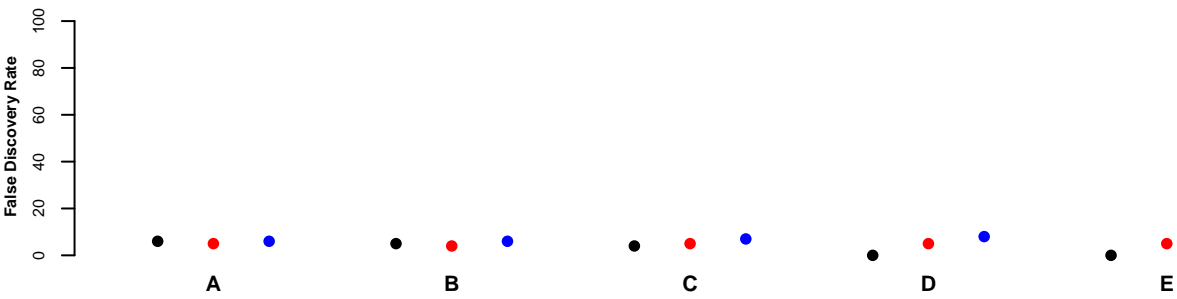

Supplement: gb-2007-8-10-r228-S6.pdf [file gb-2007-8-10-r228-S6.pdf]
