# Supplementary material for: Breaking the waves: improved detection of copy number variation from microarray-based comparative genomic hybridization
Source: PubMed Central journal article supplement (PMC2246302; doi:10.1186/gb-2007-8-10-r228), 2007-10-25

S20

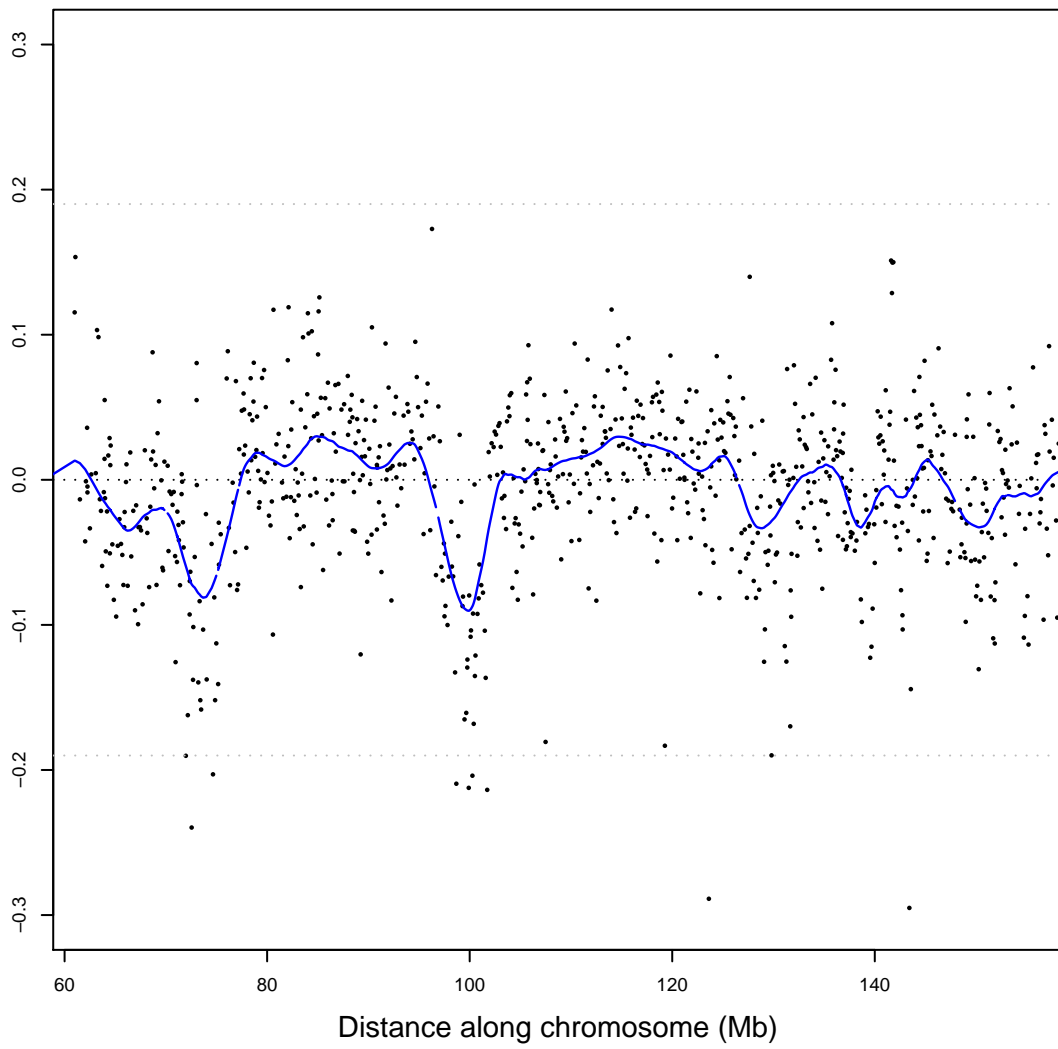

S30

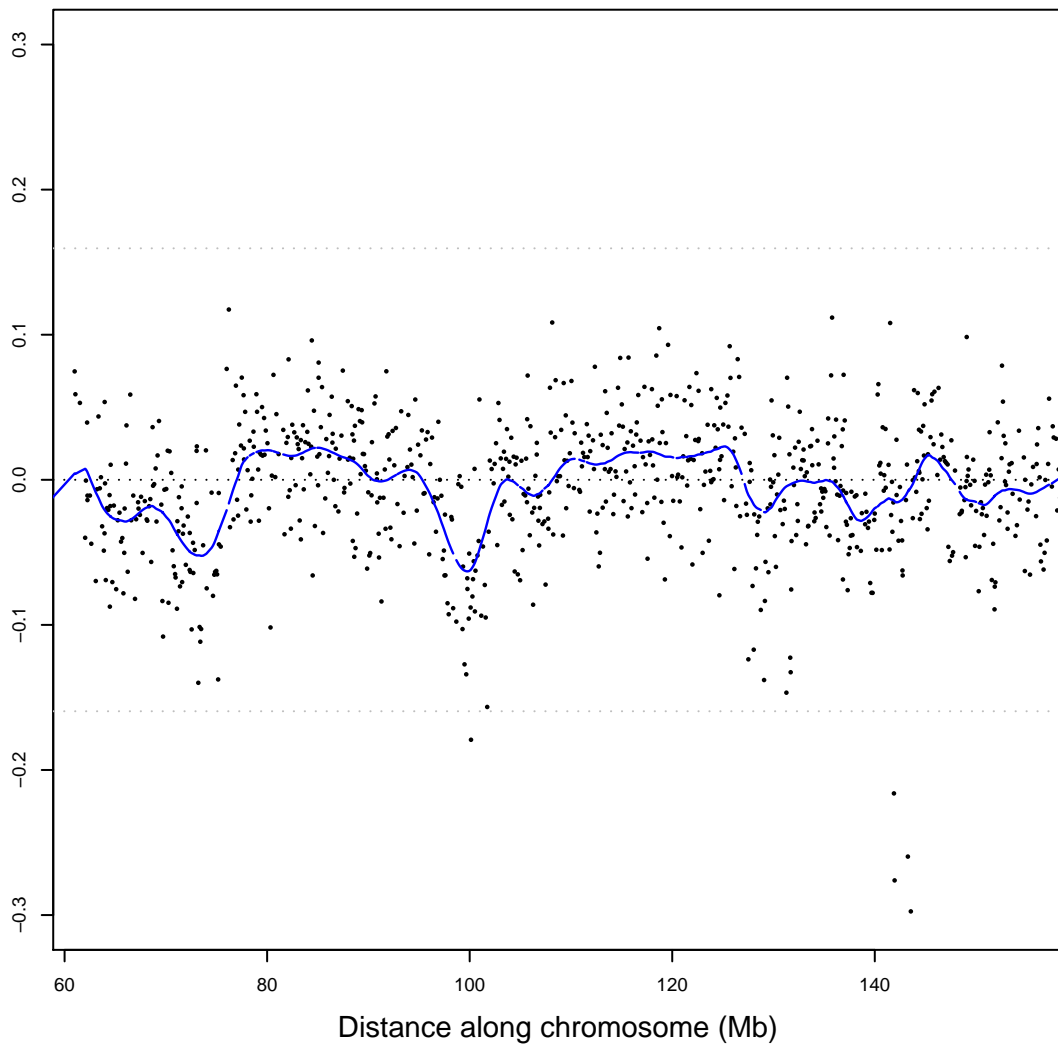

S32

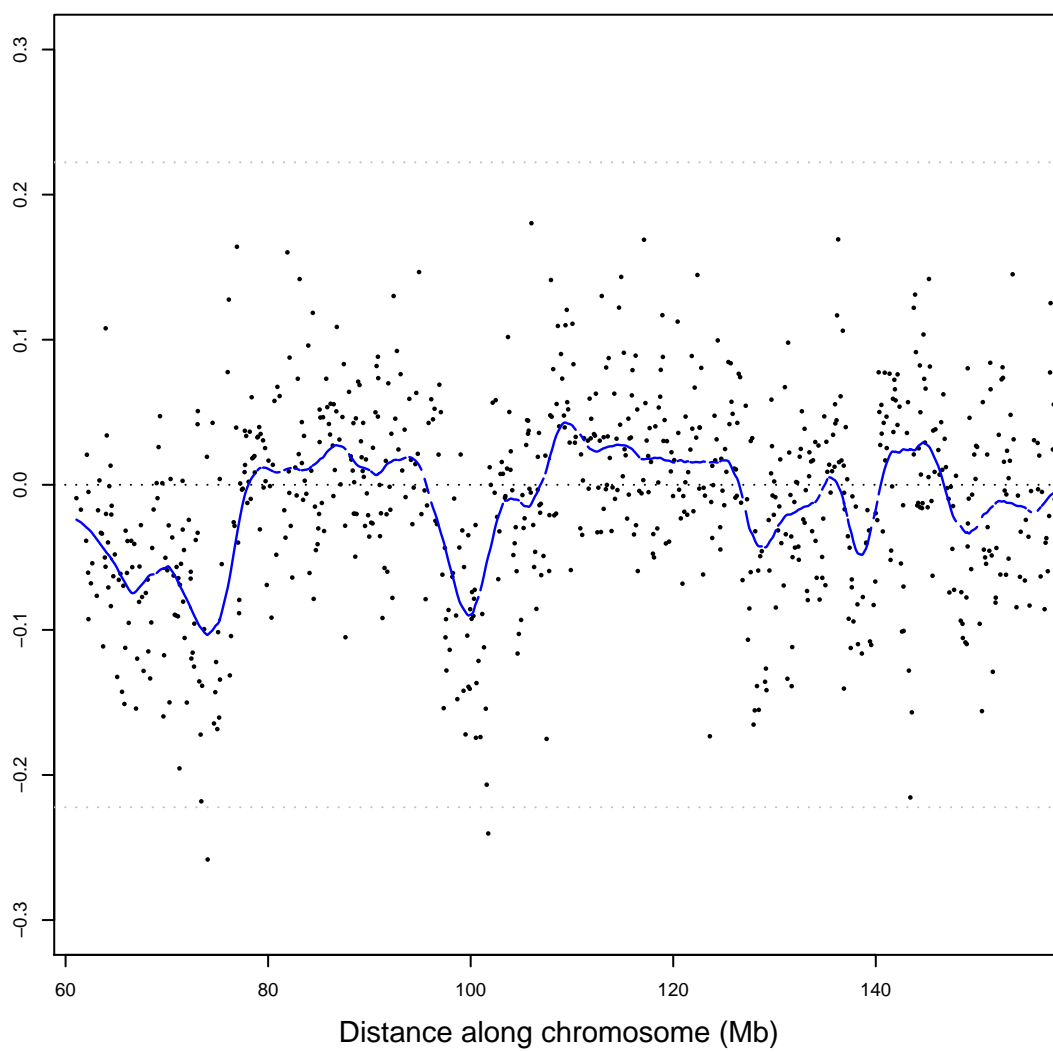

S40

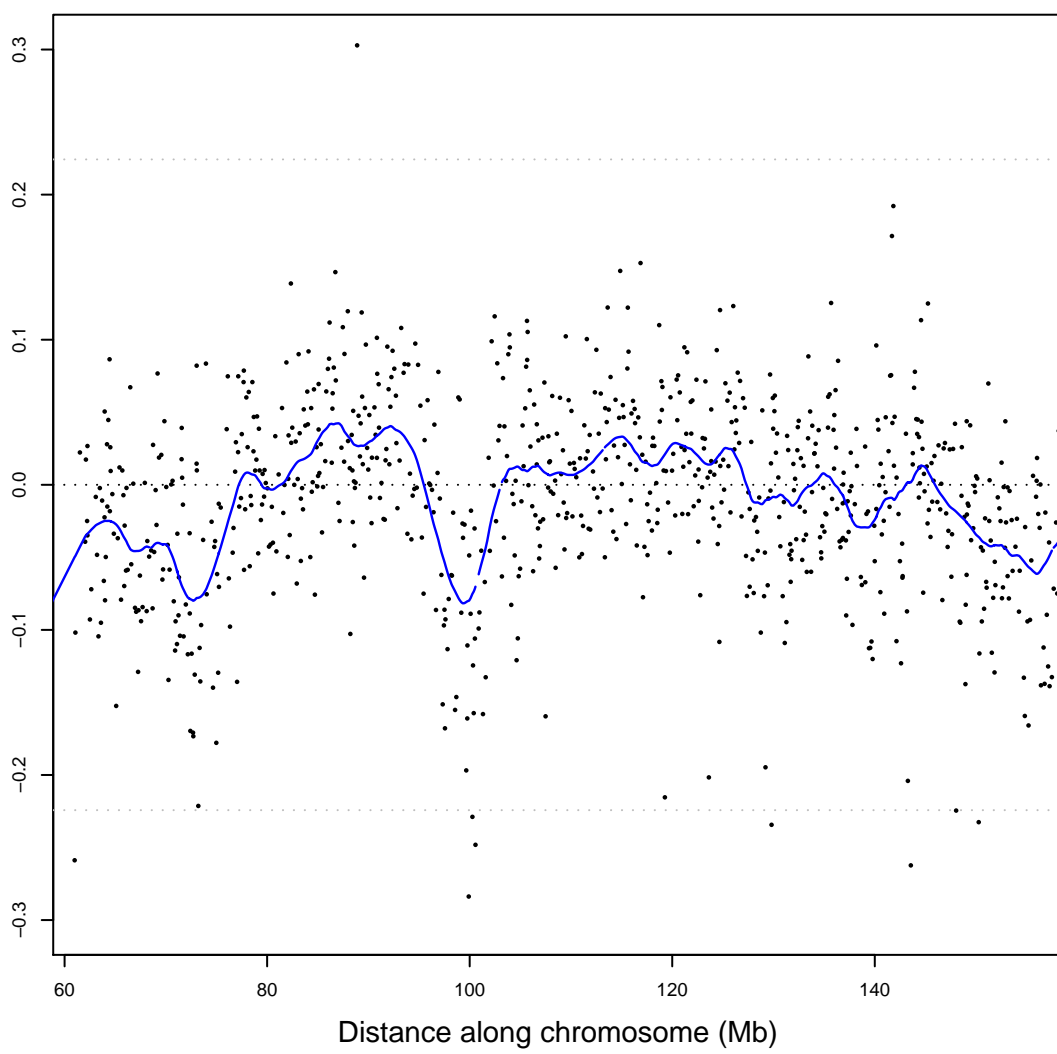

S60

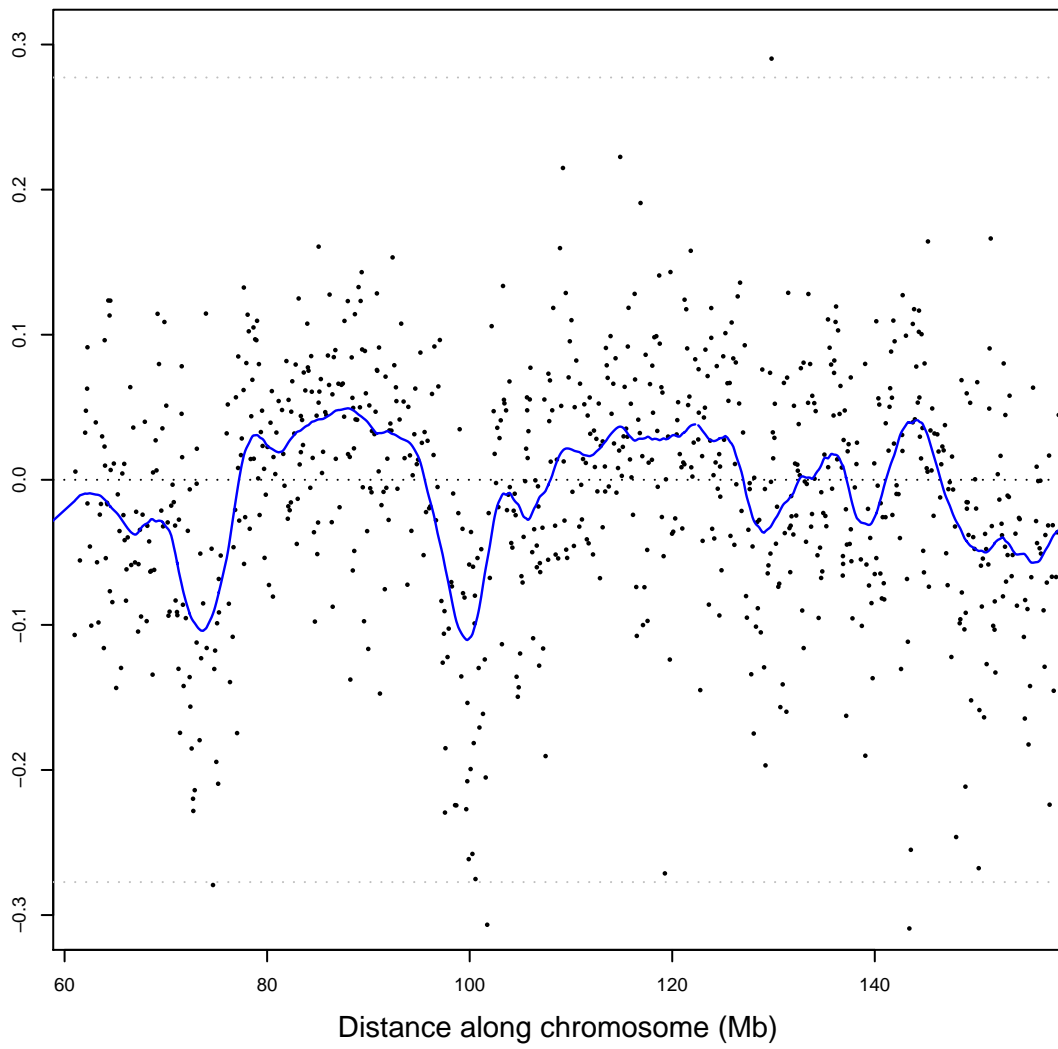

Supplement: gb-2007-8-10-r228-S10.pdf [file gb-2007-8-10-r228-S10.pdf]
